# Supplementary material for: Flame-retardant polymer-enabled space-confined carbonization toward quasi-spherical hard carbon for high-rate sodium storage
Source: Royal Society of Chemistry journal article supplement (doi:10.1039/d5qi02175h), 2026-01-01
Supplement: d5qi02175h1.pdf [file d5qi02175h1.pdf]

## Supporting Information

### **Flame-retardant polymer-enabled space-confined carbonization toward quasi-spherical hard carbon for high-rate sodium storage**

Zhuzhu Du,<sup>a</sup> Conghao Yu,<sup>a, b</sup> Lei Liu,<sup>b</sup> Jinmeng Sun<sup>\*c</sup> and Wei Ai<sup>\*b</sup>

<sup>a</sup> School of Materials Science and Engineering & Institute of Flexible Electronics and Intelligent Textile, Xi'an Polytechnic University, Xi'an 710048, China

<sup>b</sup> State Key Laboratory of Flexible Electronics & Institute of Flexible Electronics, Northwestern Polytechnical University, Xi'an 710072, China

<sup>c</sup> College of Chemistry & Chemical Engineering, Xi'an Shiyou University, Xi'an 710065, China

\*Corresponding authors: iamjmsun@xsyu.edu.cn, iamwai@nwpu.edu.cn

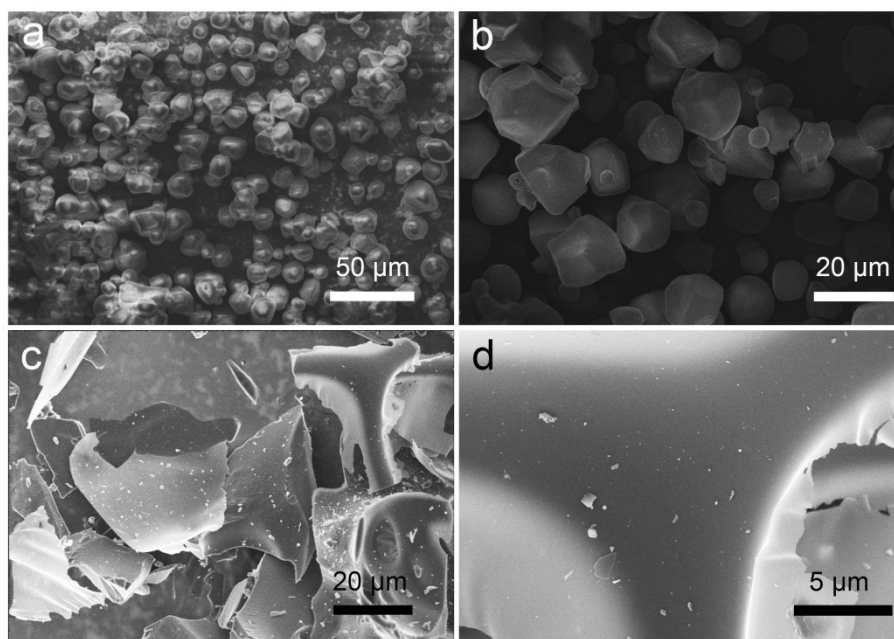

**Figure S1.** SEM images of (a, b) and (c, d) HC.

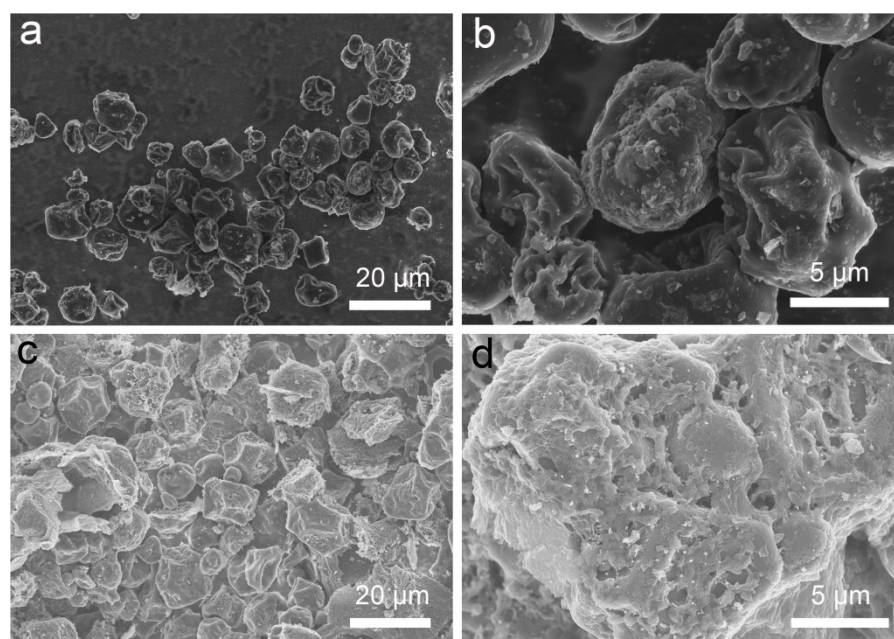

**Figure S2.** SEM images of QSHC prepared with the starch-to-PPD-PP mass ratio of (a, b) 10:1 and (c, d) 1:1.

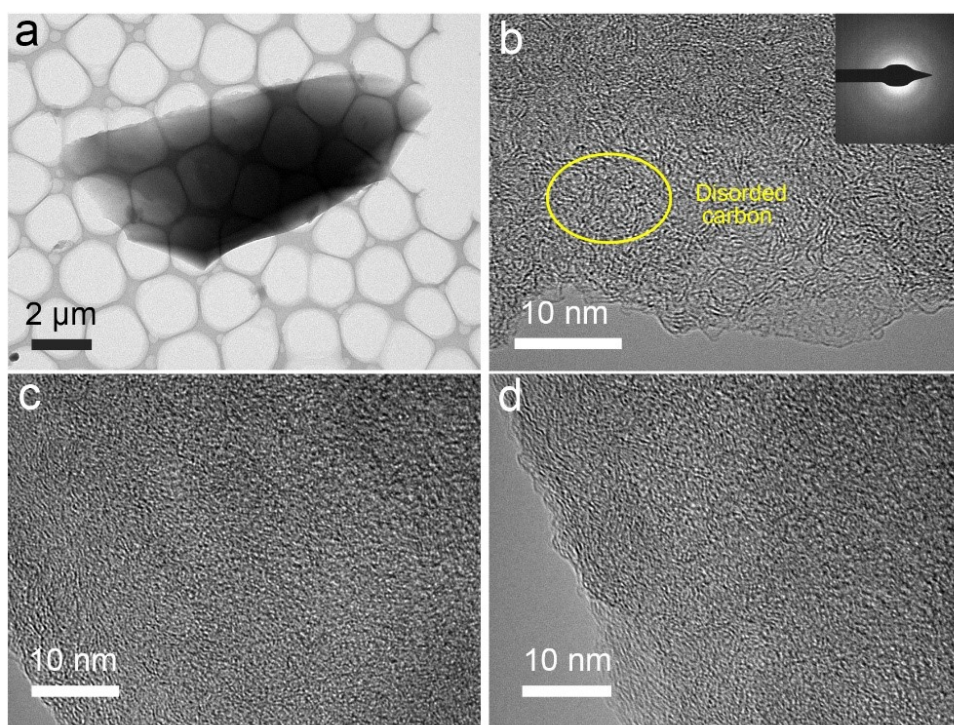

**Figure S3.** (a) TEM and (b-d) HRTEM images of HC.

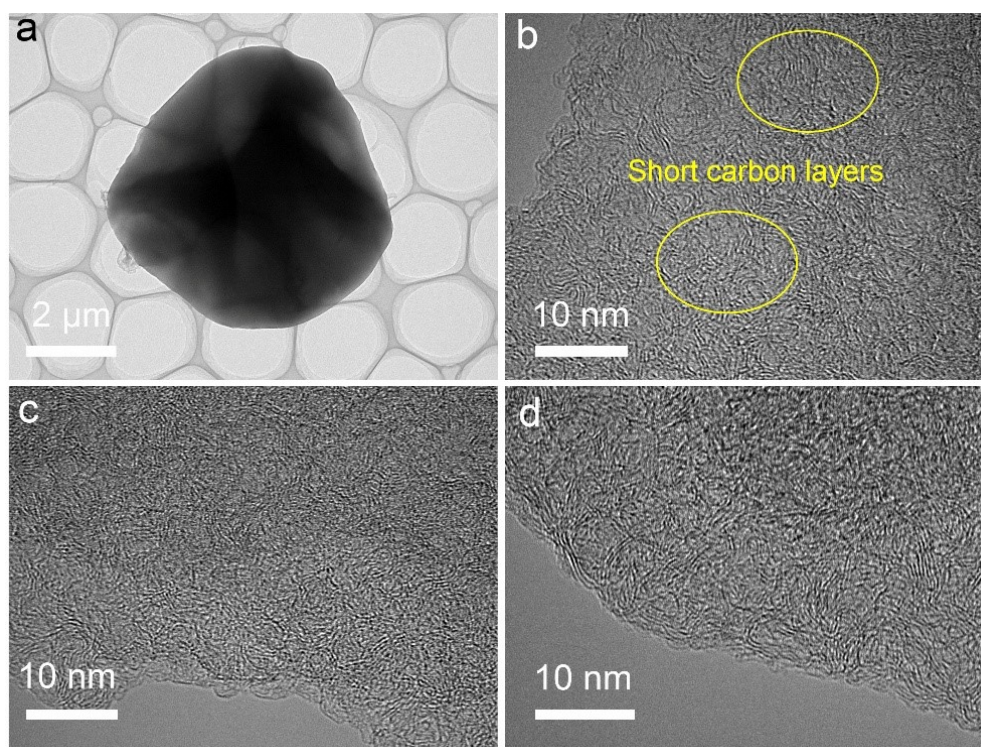

**Figure S4.** (a) TEM and (b-d) HRTEM images of QSHC.



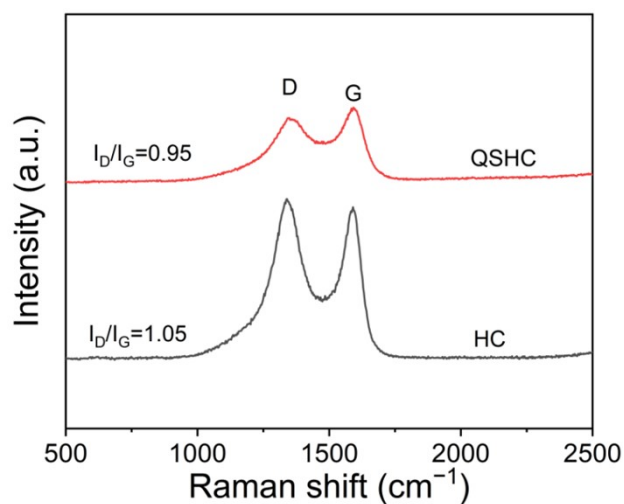

**Figure S5.** Raman spectra of QSHC and HC.

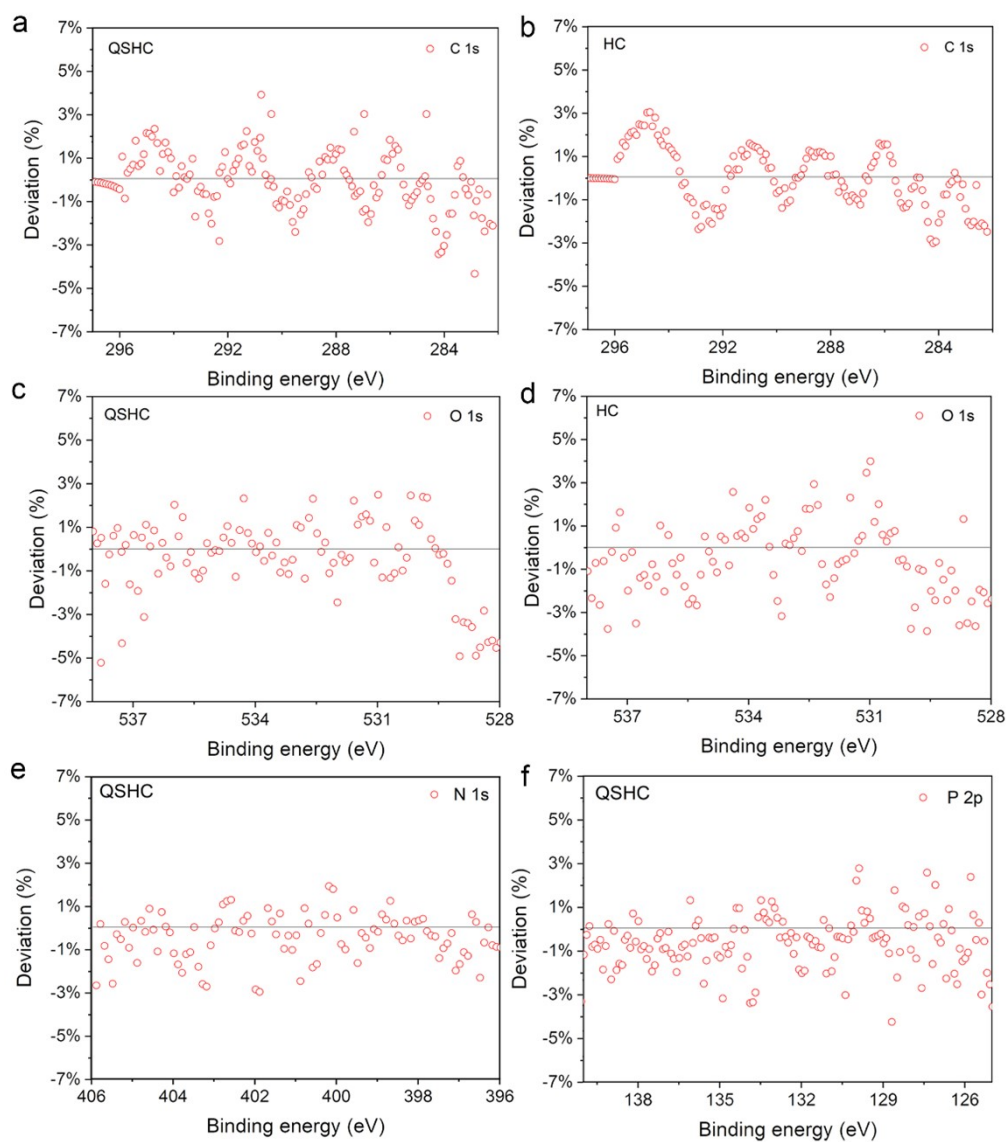

**Figure S6.** Residual plots of the fitted XPS spectra of (a, b) C 1s, (c, d) O 1s, (e) N 1s, and (f) P 2p, which belong to (a, c, e, f) QSHC and (b, d) HC samples.

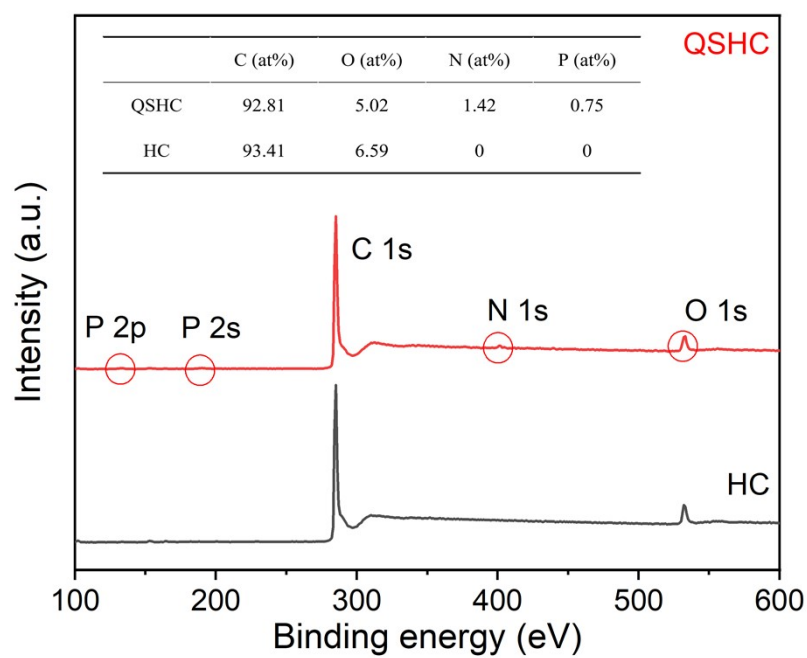

**Figure S7.** XPS survey spectra of QSHC and HC associated with their atomic contents.

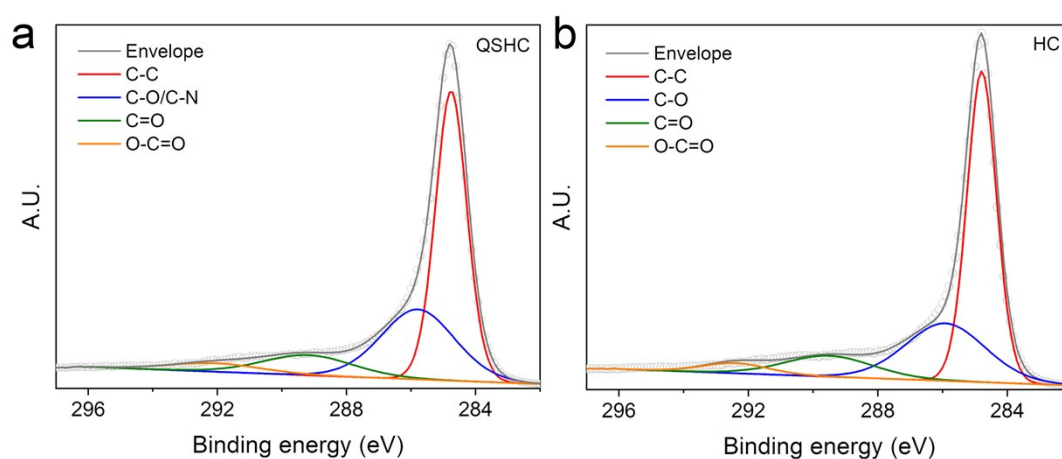

**Figure S8.** High-resolution C 1s XPS spectra of (a) QSHC and (b) HC.

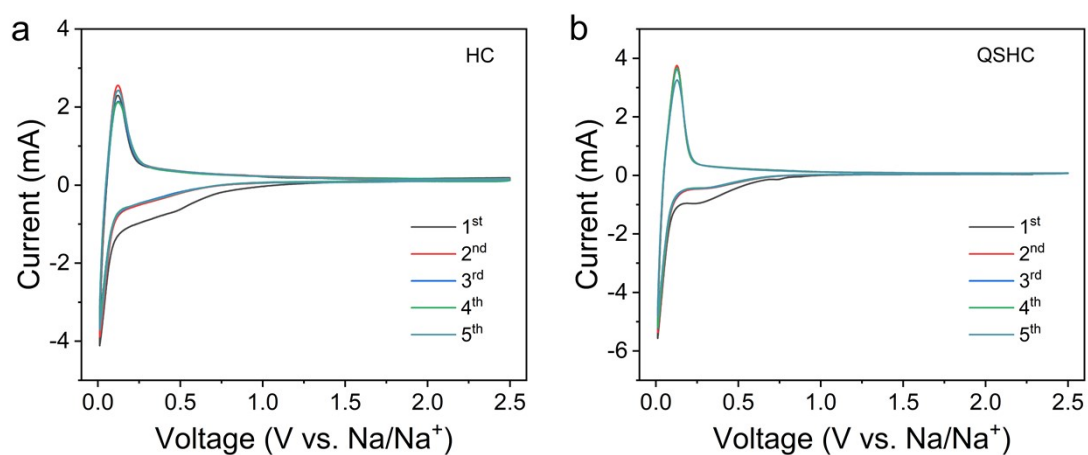

**Figure S9.** CV profiles of (a) HC and (b) QSHC from 1<sup>st</sup> to 5<sup>th</sup> cycles.

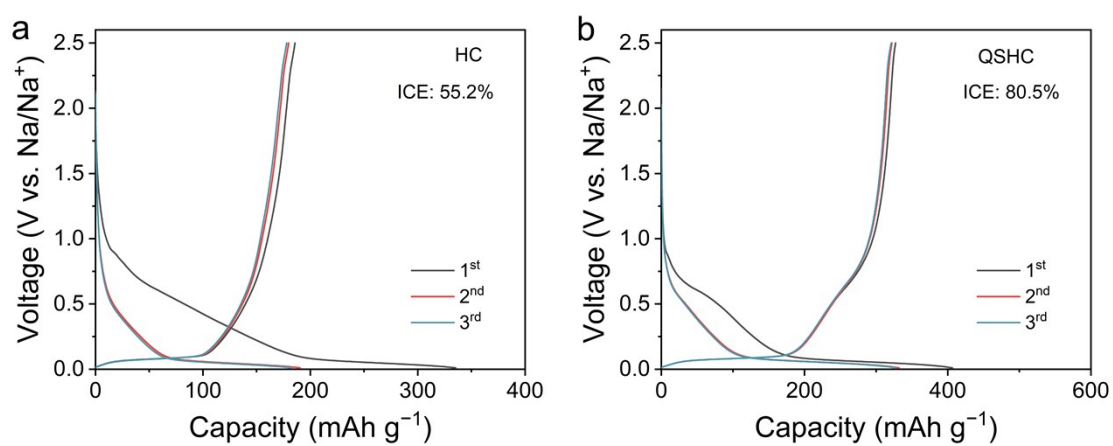

**Figure S10.** GCD curves of (a) HC and (b) QSHC for the initial 3 cycles.

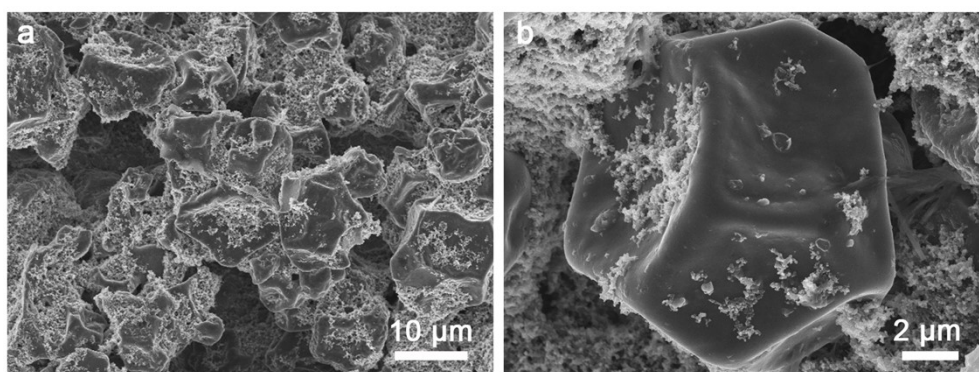

**Figure S11.** (a, b) SEM images of QSHC electrode after 100 cycles at 1 A g<sup>-1</sup>.

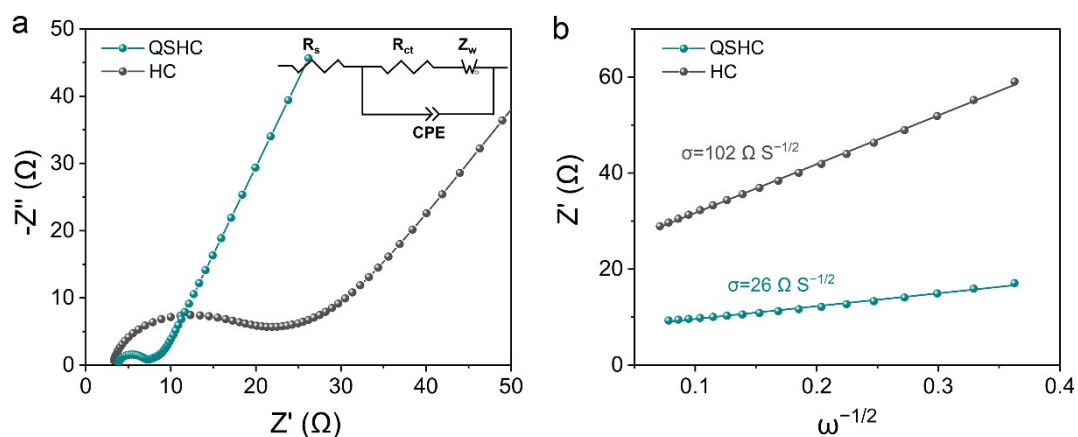

**Figure S12.** (a) EIS curves of QSHC and HC-based coin cells. (b) Linear fitting relationship between  $Z'$  and  $\omega^{-1/2}$  for QSHC and HC electrodes.

**Table S1.** Nitrogen sorption results of HC and QSHC.

|      | Adsorption volume<br>(cm <sup>3</sup> STP g <sup>-1</sup> ) | Specific surface<br>area (m <sup>2</sup> g <sup>-1</sup> ) | Total pore volume<br>(cm <sup>3</sup> g <sup>-1</sup> ) | Average pore<br>size (nm) |
|------|-------------------------------------------------------------|------------------------------------------------------------|---------------------------------------------------------|---------------------------|
| HC   | 86.146                                                      | 343                                                        | 0.177                                                   | 4.703                     |
| QSHC | 30.567                                                      | 111                                                        | 0.077                                                   | 9.727                     |

**Table S2.** Fitting parameters, references, and RSS of the XPS spectra.

|      | Background<br>type | Peak<br>shape | RSS (Residual Sum<br>of Squares) | References                                  |
|------|--------------------|---------------|----------------------------------|---------------------------------------------|
| C 1s | Shirley            | LG30          | QSHC: 472.35<br>HC: 397.22       | <i>J. Mater. Chem. A</i> 2014, 2, 12924     |
| O 1s |                    |               | QSHC: 113.53<br>HC: 141.18       | <i>Adv. Funct. Mater.</i> 2021, 31, 2104137 |
| N 1s |                    |               | QSHC: 6.64                       | <i>Adv. Mater.</i> 2023, 35, 2211461        |
| P 2p |                    |               | QSHC: 4.27                       | <i>Adv. Funct. Mater.</i> 2025, 35, 2426075 |

**Table S3.** Performance comparison of QSHC with previously reported HC anodes for sodium storage.

| Sample      | Rate                                               | Plateau capacity contribution (%) | Cycling                                                          | ICE (%)     | Ref.                                       |
|-------------|----------------------------------------------------|-----------------------------------|------------------------------------------------------------------|-------------|--------------------------------------------|
| <b>QSHC</b> | <b>180 mAh g<sup>-1</sup> at 1A g<sup>-1</sup></b> | <b>71.1</b>                       | <b>171 mAh g<sup>-1</sup> at 1A g<sup>-1</sup> (2000 cycles)</b> | <b>80.5</b> | <b>This work</b>                           |
| HC300-1000  | 60 mAh g <sup>-1</sup> at 1 A g <sup>-1</sup>      | 55.4                              | ~250 mAh g <sup>-1</sup> at 0.1 A g <sup>-1</sup> (100 cycles)   | 82.5        | <i>Energy Storage Mater.</i> 2022, 51, 620 |
| PCLC        | 106.1 mAh g <sup>-1</sup> at 1 A g <sup>-1</sup>   | 59.4                              | 246.8 mAh g <sup>-1</sup> at 0.3 A g <sup>-1</sup> (1000 cycles) | 88.4        | <i>Energy Storage Mater.</i> 2023, 56, 532 |
| HCG         | 106 mAh g <sup>-1</sup> at 1 A g <sup>-1</sup>     | 25                                | 198 mAh g <sup>-1</sup> at 0.1 A g <sup>-1</sup> (200 cycles)    | 80.1        | <i>Chem. Eng. J.</i> 2022, 432, 133257     |
| SSHC        | 198.5 mAh g <sup>-1</sup> at 2 A g <sup>-1</sup>   | -                                 | 158 mAh g <sup>-1</sup> at 3A g <sup>-1</sup> (1000 cycles)      | -           | <i>J. Mater. Chem. A</i> 2020, 8, 14993    |
| CS@2%PP     | 92 mAh g <sup>-1</sup> at 0.5 A g <sup>-1</sup>    | 73.3                              | 272 mAh g <sup>-1</sup> at 0.025 A g <sup>-1</sup> (50 cycles)   | 81          | <i>Energy Technol.</i> 2019, 7, 1900779    |
| HC-SC       | 122 mAh g <sup>-1</sup> at 1 A g <sup>-1</sup>     | -                                 | 241 mAh g <sup>-1</sup> at 0.05 A g <sup>-1</sup> (100 cycles)   | 92.7        | <i>Mater. Lett.</i> 2023, 330, 133368      |
| BHCS-1200   | 198.5 mAh g <sup>-1</sup> at 2 A g <sup>-1</sup>   | ~60                               | 180 mAh g <sup>-1</sup> at 0.1 A g <sup>-1</sup> (1000 cycles)   | 65.4        | <i>J. Mater. Chem. A</i> 2022, 10, 17225   |

**Table S4.** Fitted parameters using the Nyquist equivalent circuit model.

|      | $R_s$ ( $\Omega$ ) | $R_{ct}$ ( $\Omega$ ) |
|------|--------------------|-----------------------|
| QSHC | 3.205              | 2.736                 |
| HC   | 3.838              | 13.012                |

**Table S5.** Power and energy density of QSHC//NCPFC full cell at different current densities.

|                                       | Current density (A g <sup>-1</sup> )                                                                                             |       |        |        |        |
|---------------------------------------|----------------------------------------------------------------------------------------------------------------------------------|-------|--------|--------|--------|
|                                       | 0.1                                                                                                                              | 0.2   | 0.5    | 1.0    | 2.0    |
| Power (W)                             | 56.5                                                                                                                             | 112.1 | 298.2  | 541.1  | 938.3  |
| Power density (W kg <sup>-1</sup> )   | 424.6                                                                                                                            | 842.7 | 2241.6 | 4066.9 | 7052.5 |
| Energy (Wh)                           | 45.3                                                                                                                             | 43.5  | 40.2   | 36.0   | 31.9   |
| Energy density (Wh kg <sup>-1</sup> ) | 340.4                                                                                                                            | 327.1 | 302.2  | 270.4  | 239.7  |
| Mass loading of active materials      | $M_p$ : 4.0 mg cm <sup>-2</sup> ; $A_p$ : 1.54 cm <sup>2</sup><br>$M_n$ : 1.2 mg cm <sup>-2</sup> ; $A_n$ : 1.13 cm <sup>2</sup> |       |        |        |        |
